# Supplementary material for: Alteration of Gut Microbiota and Inflammatory Cytokine/Chemokine Profiles in 5-Fluorouracil Induced Intestinal Mucositis
Source: PubMed Central journal article supplement (PMC5662589; doi:10.3389/fcimb.2017.00455), 2017-10-26
Supplement: Presentation1.pdf [file Presentation1.pdf]

**Alteration of gut microbiota and inflammatory cytokine/chemokine profiles in 5-fluorouracil induced **intestinal** mucositis**

**Hong-Li Li<sup>#</sup>, Lan Lu<sup>#</sup>, Xiao-Shuang Wang, Li-Yue Qin, Ping Wang, Shui-Ping Qiu, Hui Wu, Fei Huang, Bei-Bei Zhang, Hai-Lian Shi<sup>\*</sup>, Xiao-Jun Wu<sup>\*</sup>**

*Shanghai Key Laboratory of **Compound Chinese Medicines**, The Ministry of Education (MOE) Key Laboratory for Standardization of Chinese Medicines, Institute of Chinese Materia Medica, Shanghai University of Traditional Chinese Medicine, Shanghai, 201203, China*

\* Corresponding author at: Institute of Chinese Materia Medica, Shanghai University of Traditional Chinese Medicine, 1200 Cailun Road, Shanghai, 201203, China. Tel.: +86 21 51322577; Fax: +86 21 51322578; E-mail address: shihailian2003@163.com (HL Shi); xiaojunwu320@126.com (XJ Wu).

<sup>#</sup>These authors contributed equally to this work.

**Running title:** Gut microbiota and 5-Fu induced **intestinal** mucositis

Table S1 The composition of the flora community at the level of phylum in feces (T-test)

| Composition            | Control               | 5-Fu                 | P value   |
|------------------------|-----------------------|----------------------|-----------|
| Verrucomicrobia        | 0.4356±0.06799        | 0.4027±0.04211       | 0.6799    |
| Bacteroidetes          | 0.4231±0.08080        | 0.4768±0.02934       | 0.5153    |
| Firmicutes             | 0.1452±0.02328        | 0.06948±0.01062      | 0.0253 *  |
| Proteobacteria         | 0.02551±0.005710      | 0.008886±0.0003568   | 0.0272 *  |
| Cyanobacteria          | 0.002693±0.0007608    | 0.0001695±0.0001695  | 0.0084 ** |
| Actinobacteria         | 0.0002417±0.00009627  | 0.0008819±0.00008486 | 0.0016 ** |
| Candidate division TM7 | 0.003212±0.0006694    | 0.0006372±0.0002150  | 0.0049 ** |
| Deferribacteres        | 0.00009818±0.00007302 | 0.0002962±0.00007995 | 0.1172    |
| Tenericutes            | 0.00238574            |                      |           |

Table S2 The composition of the flora community at the level of class in feces (T-test)

| Composition          | Control             | 5-Fu                | P value  |
|----------------------|---------------------|---------------------|----------|
| Verrucomicrobiae     | 0.4356±0.06799      | 0.4027±0.04211      | 0.6799   |
| Bacteroidia          | 0.4917±0.09291      | 0.4768±0.02934      | 0.8818   |
| Clostridia           | 0.1229±0.02367      | 0.09086±0.03353     | 0.4573   |
| Eosilonproteobactera | 0.001462±0.0003436  | 0.004515±0.001169   | 0.0367 * |
| Grammaproteobacteria | 0.006617±0.001381   | 0.003769±0.001427   | 0.2018   |
| Alphaproteobacteria  | 0.01415±0.005350    | 0.0007946±0.0007084 | 0.0264 * |
| Deltaproteobacteria  | 0.003296±0.0005752  | 0.002056±0.0005849  | 0.1789   |
| Erysipelotrichia     | 0.005560±0.002444   | 0.007786±0.002730   | 0.5603   |
| Bacilli              | 0.001445±0.0005651  | 0.0004300±0.0002130 | 0.1722   |
| Deferribacteres      | 0.0005289±0.0004344 | 0.0006517±0.0003609 | 0.8333   |
| Unclassified         | 0.004468±0.001312   | 0.001754±0.0001729  | 0.0861   |
| Nollocutes           | 0.00192405          |                     |          |
| Actinobacteri        |                     | 0.00020656          |          |

Table S3 The composition of the flora community at the level of order in feces  
(T-test)

| Composition        | Control             | 5-Fu                | P value  |
|--------------------|---------------------|---------------------|----------|
| Verrucomicrobiales | 0.3488±0.1015       | 0.4027±0.04211      | 0.6373   |
| Bacteroidales      | 0.4917±0.09291      | 0.4768±0.02934      | 0.8818   |
| Clostridiales      | 0.1229±0.02367      | 0.09086±0.03353     | 0.4573   |
| Campylobacterales  | 0.001462±0.0003436  | 0.004515±0.001169   | 0.0367 * |
| Enterobacteriales  | 0.004595±0.001510   | 0.002709±0.001111   | 0.3439   |
| Rhodospirillales   | 0.01134±0.005009    | 0.0007946±0.0007084 | 0.0706   |
| Desulfovibrionales | 0.003296±0.0005752  | 0.002056±0.0005849  | 0.1789   |
| Erysipelotrichales | 0.005560±0.002444   | 0.007786±0.002730   | 0.5603   |
| Lactobacillales    | 0.001445±0.0005651  | 0.001322±0.0009072  | 0.9113   |
| Deferribacterales  | 0.001541±0.0005151  | 0.0004616±0.0002204 | 0.0700   |
| Unclassified       | 0.006959±0.002331   | 0.001013±0.0001832  | 0.0346 * |
| Coriobacterales    | 0.0005489±0.0003161 | 0.0006753±0.0001439 | 0.7253   |
| Pseudomonadales    | 0.0007853±0.0003274 | 0.001060±0.0003241  | 0.5669   |

Table S4 The composition of the flora community at the level of family in feces (T-test)

| Composition          | Control             | 5-Fu                  | P value  |
|----------------------|---------------------|-----------------------|----------|
| Verrucomicrobiaceae  | 0.3934±0.07540      | 0.4287±0.04275        | 0.6807   |
| Proteobacterales     | 0.1128±0.05667      | 0.1216±0.03597        | 0.8990   |
| Unclassified         | 0.3037±0.06738      | 0.2634±0.02136        | 0.5841   |
| Lachnospiraceae      | 0.07114±0.01841     | 0.01895±0.004308      | 0.0435 * |
| Helicobacteraceae    | 0.001462±0.0003436  | 0.004515±0.001169     | 0.0367 * |
| Ruminococcaceae      | 0.04628±0.01201     | 0.04308±0.01064       | 0.8467   |
| Bacteroidaceae       | 0.01186±0.003274    | 0.05655±0.01451       | 0.0170 * |
| Rikenellaceae        | 0.04755±0.01876     | 0.02050±0.002595      | 0.1911   |
| Enterobacteriaceae   | 0.005657±0.001386   | 0.002709±0.001111     | 0.1363   |
| Porphyromonadaceae   | 0.02587±0.008819    | 0.01738±0.003607      | 0.3988   |
| Rhodospirillaceae    | 0.01415±0.005350    | 0.0007946±0.0007084   | 0.0264 * |
| Peptococcaceae       | 0.001619±0.0004530  | 0.0008538±0.00005141  | 0.1316   |
| Desulfovibrionaceae  | 0.003296±0.0005752  | 0.009170±0.007128     | 0.4352   |
| Erysipelotrichaceae  | 0.005560±0.002444   | 0.007786±0.002730     | 0.5603   |
| Lactobacillaceae     | 0.001445±0.0005651  | 0.001322±0.0009072    | 0.9113   |
| Coriobacteriaceae    | 0.0005489±0.0003161 | 0.0006753±0.0001439   | 0.7253   |
| Defluviitaleaceae    | 0.0007847±0.0005116 | 0.00009102±0.00003922 | 0.2134   |
| Deferribacteraceae   | 0.0005289±0.0004344 | 0.0006517±0.0003609   | 0.8333   |
| Moraxellaceae        | 0.0007853±0.0003274 | 0.001060±0.0003241    | 0.5669   |
| Propionibacteriaceae |                     | 0.00020656            |          |

Table S5 The composition of the flora community at the level of genus in feces (T-test)

| Composition                     | Control              | 5-Fu                  | P value  |
|---------------------------------|----------------------|-----------------------|----------|
| <i>Akkermansia</i>              | 0.3488±0.1015        | 0.4027±0.04211        | 0.6373   |
| <i>Alloprevotella</i>           | 0.0957±0.04885       | 0.1190±0.03555        | 0.7196   |
| <i>Unclassified</i>             | 0.4189±0.08401       | 0.3219±0.03140        | 0.3112   |
| <i>Blautia</i>                  | 0.04596±0.01108      | 0.02530±0.01775       | 0.3524   |
| <i>Helicobacter</i>             | 0.001462±0.0003436   | 0.004515±0.001169     | 0.0367 * |
| <i>Anaerotruncus</i>            | 0.002597±0.0007430   | 0.003980±0.001194     | 0.3542   |
| <i>Bacteroides</i>              | 0.01186±0.003274     | 0.05655±0.01451       | 0.0170 * |
| <i>Odoribacter</i>              | 0.01156±0.003767     | 0.0002374±0.002374    | 0.0171 * |
| <i>Parabacteroides</i>          | 0.01432±0.005142     | 0.01714±0.003700      | 0.6674   |
| <i>Ruminococcus</i>             | 0.0008885±0.0002775  | 0.006665±0.002870     | 0.0801   |
| <i>Alistipes</i>                | 0.01134±0.005009     | 0.0007946±0.0007084   | 0.0706   |
| <i>Desulfovibrio</i>            | 0.01631±0.004094     | 0.01467±0.001775      | 0.7231   |
| <i>Oscillibacter</i>            | 0.002673±0.0004783   | 0.008237±0.006620     | 0.4262   |
| <i>Rikenella</i>                | 0.002713±0.0009053   | 0.002134±0.0005740    | 0.6035   |
| <i>Bilophila</i>                | 0.003474±0.0009356   | 0.005814±0.001140     | 0.1513   |
| <i>Coprococcus</i>              | 0.0006230±0.0001093  | 0.0009331±0.0005116   | 0.5697   |
| <i>Roseburia</i>                | 0.001666±0.0006232   | 0.002461±0.002059     | 0.7213   |
| <i>Lactobacillus</i>            | 0.0004067±0.0001320  | 0.001268±0.0007312    | 0.2330   |
| <i>Enterorhabdus</i>            | 0.001445±0.0005651   | 0.001322±0.0009072    | 0.9113   |
| <i>Candidatus Saccharimonas</i> | 0.0005489±0.0003161  | 0.0006753±0.0001439   | 0.7253   |
| <i>Candidatus Arthromitus</i>   | 0.002690±0.0007351   | 0.0006372±0.0002150   | 0.0279 * |
| <i>Marvinbryantia</i>           | 0.0009203±0.0002350  | 0.0001595±0.00009371  | 0.0169 * |
| <i>Mucispirillum</i>            | 0.0001703±0.00006582 | 0.001123±0.0004301    | 0.0600   |
| <i>Turicibacter</i>             | 0.0005289±0.0004344  | 0.0006517±0.0003609   | 0.8333   |
| <i>Acinetobacter</i>            | 0.0008098±0.0003323  | 0.00007907±0.00003480 | 0.0602   |
| <i>Propionibacterium</i>        | 0.0007853±0.0003274  | 0.001060±0.0003241    | 0.5669   |
| <i>Thalassospira</i>            |                      | 0.00020656            |          |

Table S6 The composition of the flora community at the level of species in feces (T-test)

| Composition                                | Control               | 5-Fu                | P value  |
|--------------------------------------------|-----------------------|---------------------|----------|
| <i>Unclassified</i>                        | 0.7238±0.06837        | 0.6403±0.02355      | 0.2815   |
| <i>Uncultured bacyperoidales bacterium</i> | 0.2062±0.04252        | 0.2685±0.02144      | 0.2272   |
| <i>Helicobacter ganmani</i>                | 0.001051±0.0003576    | 0.002833±0.0007646  | 0.0678   |
| <i>Anaerotruncus sp. G3</i>                | 0.002067±0.0006848    | 0.003487±0.0009402  | 0.2568   |
| <i>Gut metagenome</i>                      | 0.0307932             |                     |          |
| <i>Bacteroides vulgatus(ATCC 8428)</i>     | 0.0002376±0.00005330  | 0.03796±0.01395     | 0.0269 * |
| <i>Eubacterium coprostanoligenes</i>       | 0.00515534            |                     |          |
| <i>Firmicutes bacterium ASF500</i>         | 0.003883±0.001304     | 0.002433±0.0005846  | 0.3402   |
| <i>Parabacteroides goldsteinii</i>         | 0.0003321±0.0001730   | 0.009337±0.002903   | 0.0147 * |
| <i>Clostridium papyrosolvans</i>           | 0.01048±0.009080      | 0.002972±0.001697   | 0.4397   |
| <i>Mouse gut metagenome</i>                | 0.0003874±0.0001732   | 0.001335±0.0007863  | 0.2730   |
| <i>Bacteroides acidifaciens</i>            | 0.004226±0.0006173    | 0.01081±0.002800    | 0.0508   |
| <i>Lachnospiraceae bacterium 610</i>       | 0.0000327765          |                     |          |
| <i>Uncultured rikenellaceae bacterium</i>  | 0.0005278±0.0001933   | 0.005373±0.001754   | 0.0252 * |
| <i>Bacteroids uniformis</i>                | 0.00005299±0.00003684 | 0.005662±0.002817   | 0.0816   |
| <i>Desulfovibrio sp. ABHUISB</i>           | 0.0005155±0.0004584   | 0.0004687±0.0002772 | 0.9326   |
| <i>Unidentified rumen bacterium RFN71</i>  | 0.001409±0.0004383    | 0.002340±0.0009056  | 0.3817   |
| <i>Clostridium sp. ABHUISB</i>             | 0.00007113±0.00005451 | 0.0003307±0.0001612 | 0.1656   |
| <i>Bacteroides bacterium ph8</i>           | 0.0002058±0.00008006  | 0.0003478±0.0001581 | 0.4462   |
| <i>Lachnospiraceae bacterium 10-1</i>      | 0.0006687±0.0004080   | 0.0001456±0.0001066 | 0.2500   |
| <i>Dorea sp. 5-2</i>                       | 0.0005632±0.0001401   | 0.0006022±0.0001472 | 0.8524   |
| <i>Clostridium sp. Culture-41</i>          | 0.0009228±0.0002589   | 0.0001941±0.0001198 | 0.0339 * |
| <i>Clostridiales bacterium CIEAF 020</i>   | 0.00274196            |                     |          |
| <i>Clostridiales bacterium CIEAF 012</i>   | 0.0001703±0.00006582  | 0.001123±0.0004301  | 0.0600   |
| <i>Unclutured clostridiales bacterium</i>  |                       | 0.000437517         |          |
| <i>Unclutured rumen bacterium</i>          | 0.001691±0.0009883    | 0.0007946±0.0007084 | 0.4819   |
| <i>Bacteroides stercoris(ATCC 43183)</i>   | 0.0001507±0.00001942  | 0.0002309±0.0001230 | 0.5376   |
| <i>Clostridium sp. Culture-27</i>          | 0.000163524           |                     |          |
| <i>Clostridium leptum</i>                  | 0.0002351±0.00004341  | 0.0007264±0.0003916 | 0.2477   |
| <i>Lactobacillus murinus</i>               | 0.001206±0.0005052    | 0.0009966±0.0008175 | 0.8327   |
| <i>Clostridium sp. ATCC 29733</i>          |                       | 0.000525516         |          |

Table S7 The composition of the flora community at the level of phylum in cecum contents (T-test)

| Composition            | Control              | 5-Fu                  | P value   |
|------------------------|----------------------|-----------------------|-----------|
| Verrucomicrobia        | 0.3007±0.06402       | 0.4991±0.03395        | 0.0135 *  |
| Bacteroidetes          | 0.3284±0.07683       | 0.3162±0.03796        | 0.8877    |
| Firmicutes             | 0.2881±0.03875       | 0.1530±0.02468        | 0.0088 ** |
| Proteobacteria         | 0.05923±0.01809      | 0.02911±0.005661      | 0.1149    |
| Cyanobacteria          | 0.001784±0.0004976   | 0.00005597±0.00003290 | 0.0019 ** |
| Actinobacteria         | 0.0002655±0.00005982 | 0.001087±0.0003288    | 0.0243 *  |
| Candidate division TM7 | 0.002187±0.0007248   | 0.0009700±0.0003831   | 0.1549    |
| Deferribacteres        | 0.001541±0.0005151   | 0.0004616±0.0002204   | 0.0700    |
| Tenericutes            | 00.000594389         | 0                     |           |

Table S8 The composition of the flora community at the level of class in cecum contents (T-test)

| Composition          | Control            | 5-Fu                  | P value   |
|----------------------|--------------------|-----------------------|-----------|
| Verrucomicrobiae     | 0.3007±0.06402     | 0.4991±0.03395        | 0.0135 *  |
| Bacteroidia          | 0.3007±0.06402     | 0.3162±0.03796        | 0.8374    |
| Clostridia           | 0.2828±0.03895     | 0.1471±0.02481        | 0.0088 ** |
| Eosilonproteobacteia | 0.02848±0.01498    | 0.003005±0.001033     | 0.1070    |
| Grammaproteobacteria | 0.02528±0.01890    | 0.006593±0.003346     | 0.3430    |
| Alphaproteobacteria  | 0.006536±0.001600  | 0.00005132±0.00001819 | 0.0007*** |
| Deltaproteobacteria  | 0.01481±0.002172   | 0.01946±0.005544      | 0.4444    |
| Erysipelotrichia     | 0.003592±0.0008929 | 0.003617±0.0009385    | 0.9849    |
| Bacilli              | 0.001685±0.0004087 | 0.002254±0.0007671    | 0.5207    |
| Deferribacteres      | 0.00154063         |                       |           |
| Unclassified         | 0.005586±0.001437  | 0.002113±0.0004704    | 0.0338 *  |
| Nollocutes           | 0.000594389        |                       |           |
| Actinobacteri        |                    |                       |           |

Table S9 The composition of the flora community at the level of order in cecum contents (T-test)

| Composition        | Control              | 5-Fu                  | P value   |
|--------------------|----------------------|-----------------------|-----------|
| Verrucomicrobiales | 0.3007±0.06402       | 0.4991±0.03395        | 0.0135 *  |
| Bacteroidales      | 0.3284±0.07683       | 0.3162±0.03796        | 0.8877    |
| Clostridiales      | 0.2828±0.03895       | 0.1471±0.02481        | 0.0088 ** |
| Campylobacterales  | 0.02848±0.01498      | 0.003005±0.001033     | 0.1070    |
| Enterobacteriales  | 0.02507±0.01889      | 0.006409±0.003345     | 0.3435    |
| Rhodospirillales   | 0.02507±0.01889      | 0.00005132±0.00001819 | 0.2019    |
| Desulfovibrionales | 0.01481±0.002172     | 0.01946±0.005544      | 0.4444    |
| Erysipelotrichales | 0.003592±0.0008929   | 0.003617±0.0009385    | 0.9849    |
| Lactobacillales    | 0.003592±0.0008929   | 0.002254±0.0007671    | 0.2708    |
| Deferribacterales  | 0.001541±0.0005151   | 0.0004616±0.0002204   | 0.0700    |
| Unclassified       | 0.005915±0.001555    | 0.001026±0.0003808    | 0.0068 ** |
| Coriobacterales    | 0.0002655±0.00005982 | 0.001087±0.0003288    | 0.0243 *  |
| Pseudomonadales    | 0.0002146±0.00004695 | 0.0001840±0.00003676  | 0.6135    |

Table S10 The composition of the flora community at the level of family in cecum contents (T-test)

| Composition          | Control              | 5-Fu                  | P value    |
|----------------------|----------------------|-----------------------|------------|
| Verrucomicrobiaceae  | 0.2314±0.05465       | 0.4991±0.03395        | 0.0005 *** |
| Provotellaceae       | 0.04876±0.01510      | 0.01844±0.008162      | 0.0944     |
| Unclassified         | 0.005915±0.001555    | 0.2317±0.05744        | 0.0010 *** |
| Lachnospiraceae      | 0.1813±0.03122       | 0.06647±0.01143       | 0.0033 **  |
| Helicobacteraceae    | 0.02848±0.01498      | 0.003005±0.001033     | 0.1070     |
| Ruminococcaceae      | 0.09544±0.01282      | 0.05507±0.008728      | 0.0180 *   |
| Bacteroidaceae       | 0.02718±0.007717     | 0.02695±0.004670      | 0.9796     |
| Rikenellaceae        | 0.01653±0.004766     | 0.01273±0.003335      | 0.5220     |
| Enterobacteriaceae   | 0.03553±0.02653      | 0.001483±0.0004226    | 0.1910     |
| Porphyromonadaceae   | 0.01925±0.005374     | 0.008768±0.003003     | 0.1060     |
| Rhodospirillaceae    | 0.006536±0.00600     | 0.00005132±0.00001819 | 0.0007 *** |
| Peptococcaceae       | 0.005148±0.001245    | 0.002500±0.0004356    | 0.0599     |
| Desulfovibrionaceae  | 0.01481±0.002172     | 0.01946±0.005544      | 0.4444     |
| Erysipelotrichaceae  | 0.003592±0.0008929   | 0.003617±0.0009385    | 0.9849     |
| Lactobacillaceae     | 0.001685±0.0004087   | 0.002254±0.0007671    | 0.5207     |
| Coriobacteriaceae    | 0.0002655±0.00005982 | 0.001087±0.0003288    | 0.0243 *   |
| Defluviitaleaceae    | 0.001467±0.0004206   | 0.0002832±0.00008852  | 0.0130 *   |
| Deferribacteraceae   | 0.001541±0.0005151   | 0.0004616±0.0002204   | 0.0700     |
| Moraxellaceae        | 0.0002146±0.00004695 | 0.0001840±0.00003676  | 0.6135     |
| Propionibacteriaceae |                      |                       |            |

Table S11 The composition of the flora community at the level of genus in cecum contents (T-test)

| Composition                     | Control              | 5-Fu                  | P value    |
|---------------------------------|----------------------|-----------------------|------------|
| <i>Akkermansia</i>              | 0.3007±0.06402       | 0.4991±0.03395        | 0.0135 *   |
| <i>Alloprevotella</i>           | 0.03761±0.01341      | 0.01793±0.007925      | 0.2223     |
| <i>Unclassified</i>             | 0.4034±0.05140       | 0.3519±0.02861        | 0.3931     |
| <i>Blautia</i>                  | 0.1039±0.02636       | 0.03301±0.01495       | 0.0311 *   |
| <i>Helicobacter</i>             | 0.02848±0.01498      | 0.003005±0.001033     | 0.1070     |
| <i>Anaerotruncus</i>            | 0.01379±0.002957     | 0.007140±0.001857     | 0.0728     |
| <i>Bacteroides</i>              | 0.02718±0.007717     | 0.02695±0.004670      | 0.9796     |
| <i>Odoribacter</i>              | 0.0029127            |                       |            |
| <i>Parabacteroides</i>          | 0.01633±0.004065     | 0.008768±0.003003     | 0.1518     |
| <i>Ruminococcus</i>             | 0.002033±0.0008483   | 0.003741±0.001548     | 0.3461     |
| <i>Alistipes</i>                | 0.006536±0.001600    | 0.00005132±0.00001819 | 0.0007 *** |
| <i>Desulfovibrio</i>            | 0.01250±0.003088     | 0.009522±0.002762     | 0.4819     |
| <i>Oscillibacter</i>            | 0.008491±0.0009494   | 0.01775±0.005683      | 0.1256     |
| <i>Rikenella</i>                | 0.01271±0.004157     | 0.004426±0.0009961    | 0.0684     |
| <i>Bilophila</i>                | 0.0009718±0.0004100  | 0.003209±0.0009055    | 0.0371 *   |
| <i>Coprococcus</i>              | 0.006316±0.001997    | 0.001716±0.0004276    | 0.0370 *   |
| <i>Roseburia</i>                | 0.007069±0.001690    | 0.003934±0.001230     | 0.1511*    |
| <i>Lactobacillus</i>            | 0.001019±0.0003167   | 0.002077±0.0005648    | 0.1130     |
| <i>Enterorhabdus</i>            | 0.001685±0.0004087   | 0.002254±0.0007671    | 0.5207     |
| <i>Candidatus Saccharimonas</i> | 0.0002655±0.00005982 | 0.001087±0.0003288    | 0.0243 *   |
| <i>Candidatus Arthromitus</i>   | 0.002187±0.0007248   | 0.0009700±0.0003831   | 0.1549     |
| <i>Marvinbryantia</i>           | 0.000399286          |                       |            |
| <i>Mucispirillum</i>            | 0.0001978±0.00004584 | 0.0007044±0.0002342   | 0.0479 *   |
| <i>Turicibacter</i>             | 0.001541±0.0005151   | 0.0004616±0.0002204   | 0.0700     |
| <i>Acinetobacter</i>            | 0.0007593±0.0002504  | 0.0004597±0.0002337   | 0.3933     |
| <i>Propionibacterium</i>        | 0.0002146±0.00004695 | 0.0001840±0.00003676  | 0.6135     |
| <i>Thalassospira</i>            |                      |                       |            |



Table S12 The composition of the flora community at the level of species in cecum contents (T-test)

| Composition                               | Control               | 5-Fu                    | P value    |
|-------------------------------------------|-----------------------|-------------------------|------------|
| <i>Unclassified</i>                       | 0.7847±0.03792        | 0.7725±0.03184          | 0.8078     |
| <i>Uncultured bacyeroidales bacterium</i> | 0.09597±0.03631       | 0.1617±0.02930          | 0.1762     |
| <i>Helicobacter ganmani</i>               | 0.02848±0.01498       | 0.003005±0.001033       | 0.1070     |
| <i>Anaerotruncus sp. G3</i>               | 0.01256±0.002904      | 0.005846±0.001412       | 0.0523     |
| <i>Gut metagenome</i>                     | 0.021095              |                         |            |
| <i>Bacteroides vulgatus(ATCC 8428)</i>    | 0.002781±0.001524     | 0.01700±0.004454        | 0.0073 **  |
| <i>Eubacterium coprostanoligenes</i>      | 0.00326508            |                         |            |
| <i>Firmicutes bacterium ASF500</i>        | 0.01333±0.003497      | 0.004081±0.0007758      | 0.0188 *   |
| <i>Parabacteroides goldsteinii</i>        | 0.001758±0.0009900    | 0.006612±0.002554       | 0.0932     |
| <i>Clostridium papyrosolvens</i>          | 0.004695±0.003216     | 0.0006296±0.0004238     | 0.2261     |
| <i>Mouse gut metagenome</i>               | 0.004054±0.001139     | 0.007068±0.003249       | 0.3930     |
| <i>Bacteroides acidifaciens</i>           | 0.004621±0.001216     | 0.005861±0.001077       | 0.4549     |
| <i>Lachnospiraceae bacterium 610</i>      | 0.005703±0.003249     | 0.000008447±0.000008447 | 0.0967     |
| <i>Uncultured rikenellaceae bacterium</i> | 0.0001016±0.00005553  | 0.001995±0.0004610      | 0.0007 *** |
| <i>Bacteroids uniformis</i>               | 0.0001741±0.00007605  | 0.002450±0.0006886      | 0.0041 **  |
| <i>Desulfovibrio sp. ABHUISB</i>          | 0.0009436±0.0005257   | 0.002500±0.001007       | 0.1874     |
| <i>Unidentified rumen bacterium RFN71</i> | 0.001332±0.0005893    | 0.001433±0.0002636      | 0.8775     |
| <i>Clostridium sp. ABHUISB</i>            | 0.0004405±0.00008135  | 0.0004785±0.0002046     | 0.8651     |
| <i>Bacteroides bacterium ph8</i>          | 0.0001064±0.00006598  | 0.0002876±0.00007040    | 0.0768     |
| <i>Lachnospiraceae bacterium 10-1</i>     | 0.0009771±0.0005363   | 0.0001268±0.00004718    | 0.1316     |
| <i>Dorea sp. 5-2</i>                      | 0.001606±0.0003919    | 0.001874±0.0004092      | 0.6413     |
| <i>Clostridium sp. Culture-41</i>         | 0.002975±0.0008249    | 0.001083±0.0005509      | 0.0725     |
| <i>Clostridiales bacterium CIEAF 020</i>  | 0.00287277            |                         |            |
| <i>Clostridiales bacterium CIEAF 012</i>  | 0.0001978±0.00004584  | 0.0007044±0.0002342     | 0.0479 *   |
| <i>Unclutured clostridiales bacterium</i> |                       | 0.000808674             |            |
| <i>Unclutured rumen bacterium</i>         | 0.001336±0.0008452    | 0.00005132±0.00001819   | 0.1461     |
| <i>Bacteroides stercoris(ATCC 43183)</i>  | 0.00004030±0.00001657 | 0.00002747±0.00001878   | 0.6146     |
| <i>Clostridium sp. Culture-27</i>         | 0.001982±0.001365     | 0.00005977±0.00005977   | 0.1766     |
| <i>Clostridium leptum</i>                 | 0.0004466±0.0001533   | 0.0004523±0.0001761     | 0.9809     |
| <i>Lactobacillus murinus</i>              | 0.001417±0.0003773    | 0.0008577±0.0002453     | 0.2295     |
| <i>Clostridium sp. ATCC 29733</i>         |                       | 0.000525516             |            |

Fig.S1

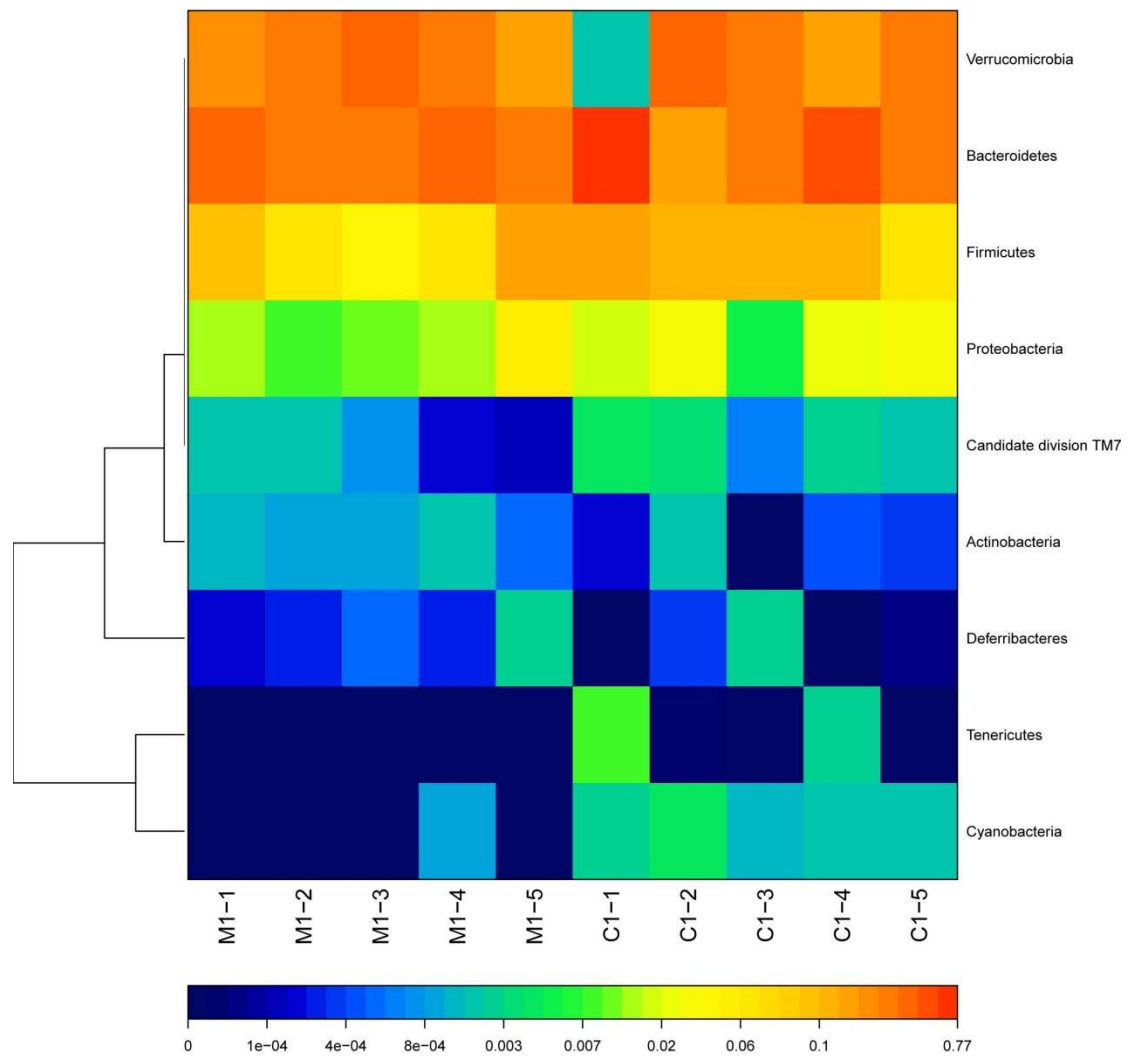

The heatmap of relative abundance of gut microbiota at phylum level in feces of mice  
M: 5-Fu treated mice; C: normal mice

Fig.S2

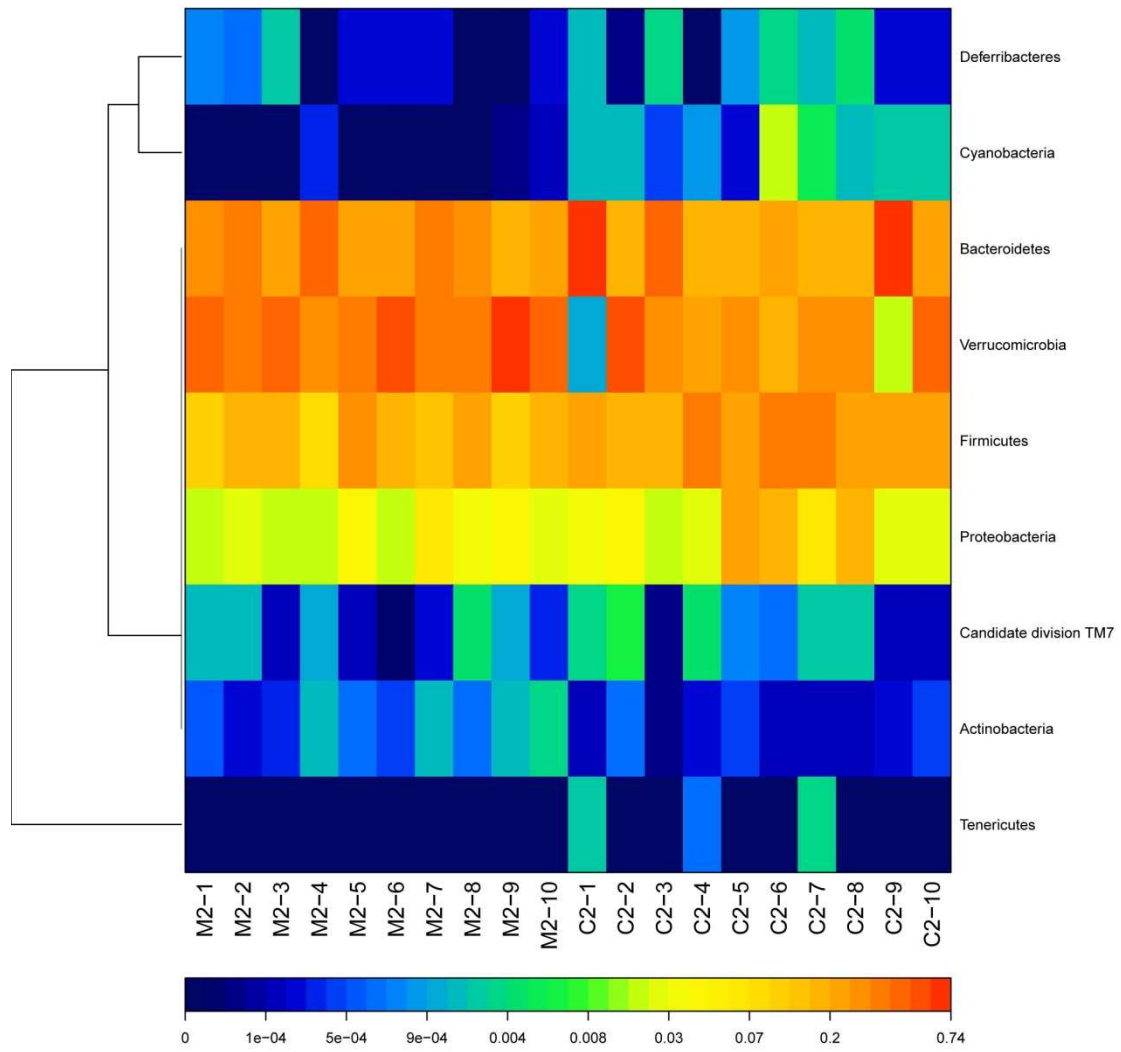

The heatmap of relative abundance of gut microbiota at phylum level in cecum contents of mice  
M: 5-Fu treated mice; C: normal mice

Fig.S3

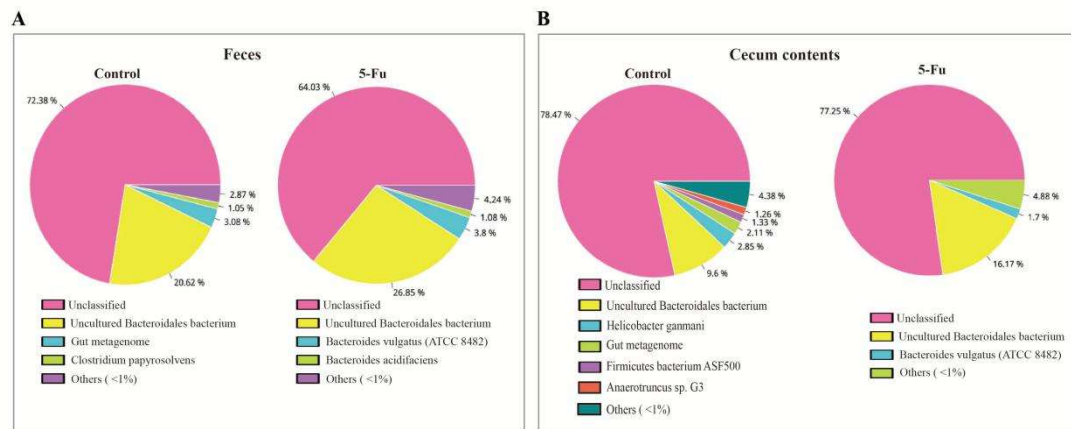

The pie charts depicting the mean relative abundances for feces and cecum contents at species level

Fig.S4

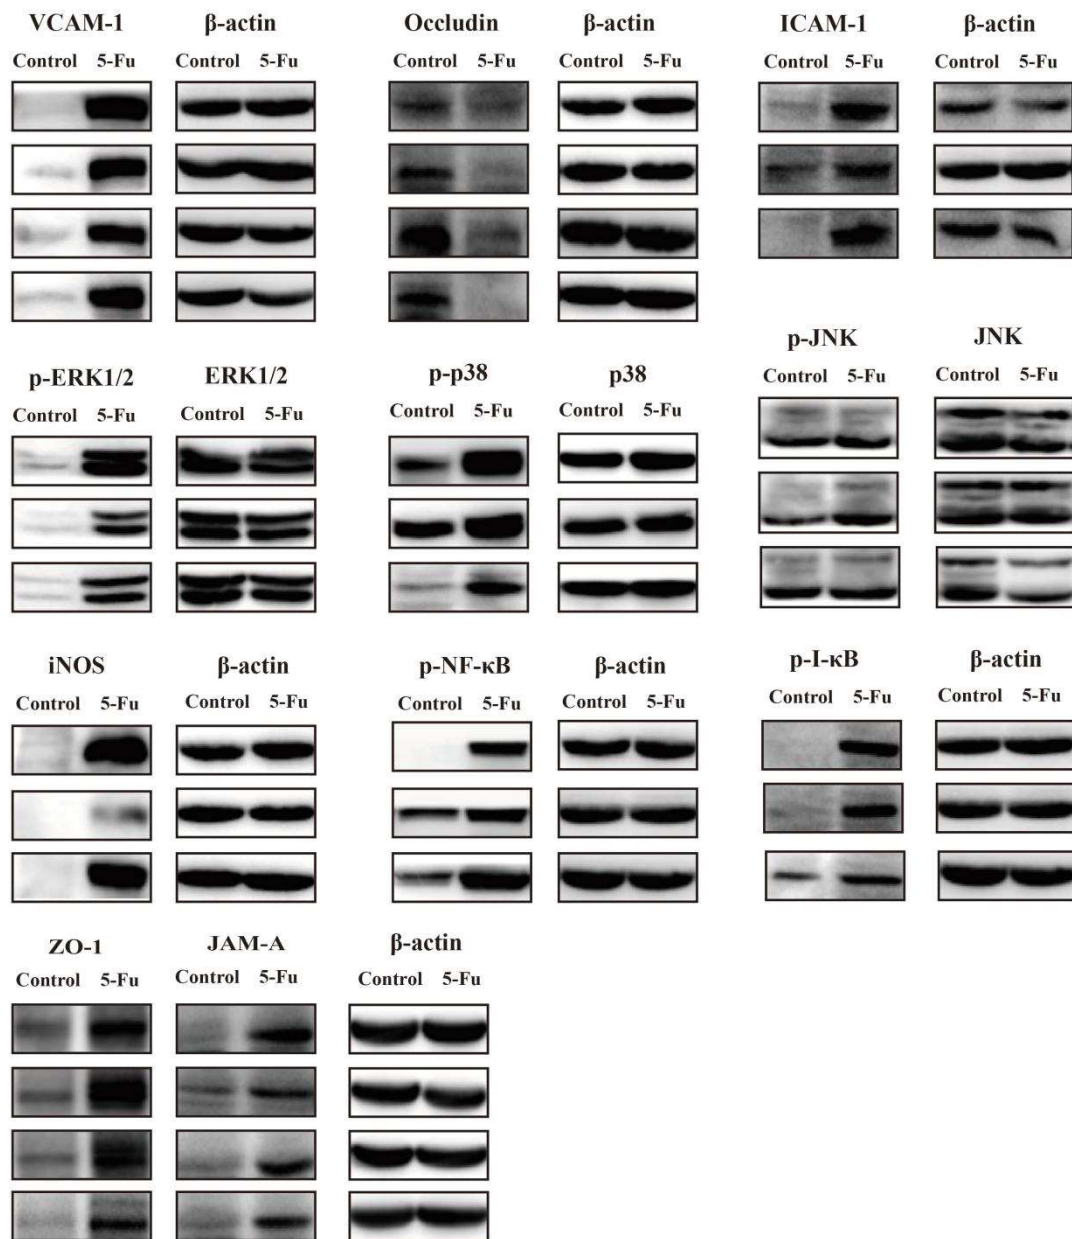

All the WB images for all the mice used in present study
